# Supplementary material for: Bio-based non-isocyanate poly(hydroxy urethane)s (PHU) derived from vanillin and CO2
Source: Royal Society of Chemistry journal article supplement (doi:10.1039/d3ma00111c), 2023-01-01
Supplement: d3ma00111c1.pdf [file d3ma00111c1.pdf]

## Supporting information

### **Bio-based Non-isocyanate Poly(hydroxy urethane)s (PHU) Derived from Vanillin and CO<sub>2</sub>**

Noé Fanjul-Mosteirín,<sup>†,‡,§</sup> Lucas Polo Fonseca,<sup>§</sup> Andrew P. Dove<sup>\*‡</sup> and Haritz Sardon<sup>\*§</sup>

<sup>†</sup> Department of Chemistry, University of Warwick, Gibbet Hill Road, Coventry, CV4 7AL, UK.

<sup>‡</sup> School of Chemistry, University of Birmingham, Edgbaston, Birmingham, B15 2TT, UK.

<sup>§</sup> POLYMAT, University of the Basque Country UPV/EHU, Joxe Mari Korta Center, Avda

Tolosa 72, 20018 Donostia-San Sebastian, Spain.

Corresponding author e-mail: [a.dove@bham.ac.uk](mailto:a.dove@bham.ac.uk)

|         |    |
|---------|----|
| Pages   | 21 |
| Figures | 43 |
| Schemes | 0  |

# $^1\text{H}$ and $^{13}\text{C}$ NMR spectra

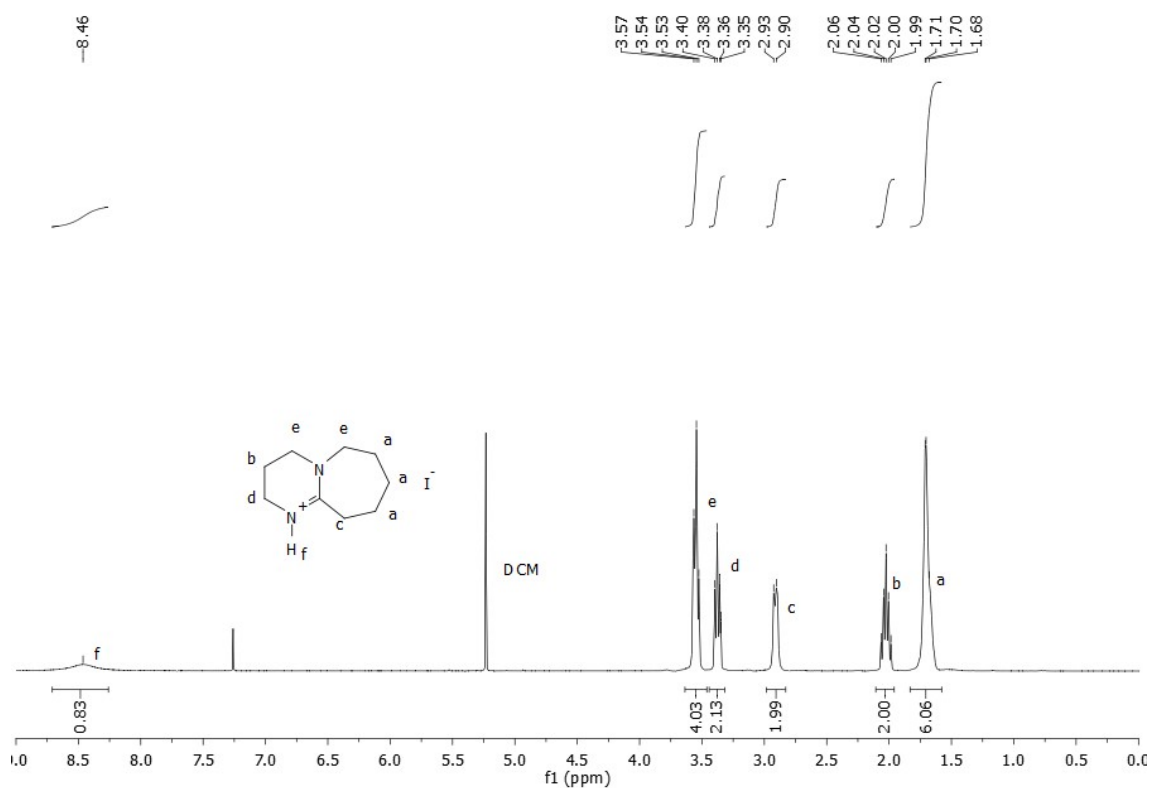

**Figure S1.**  $^1\text{H}$  NMR spectrum of [HDBU]I (300 MHz, 298 K,  $\text{CDCl}_3$ ).

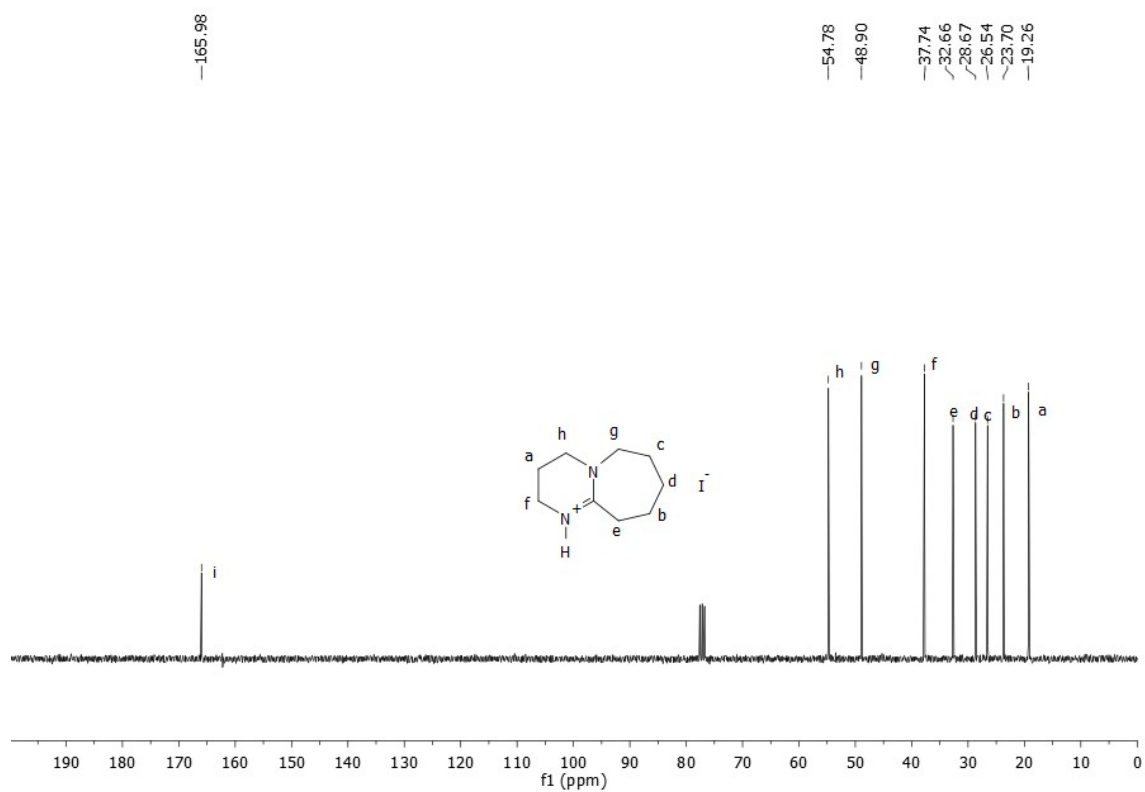

**Figure S2.**  $^{13}\text{C}$  APT NMR spectrum of [HDBU]I (75 MHz, 298 K,  $\text{CDCl}_3$ ).

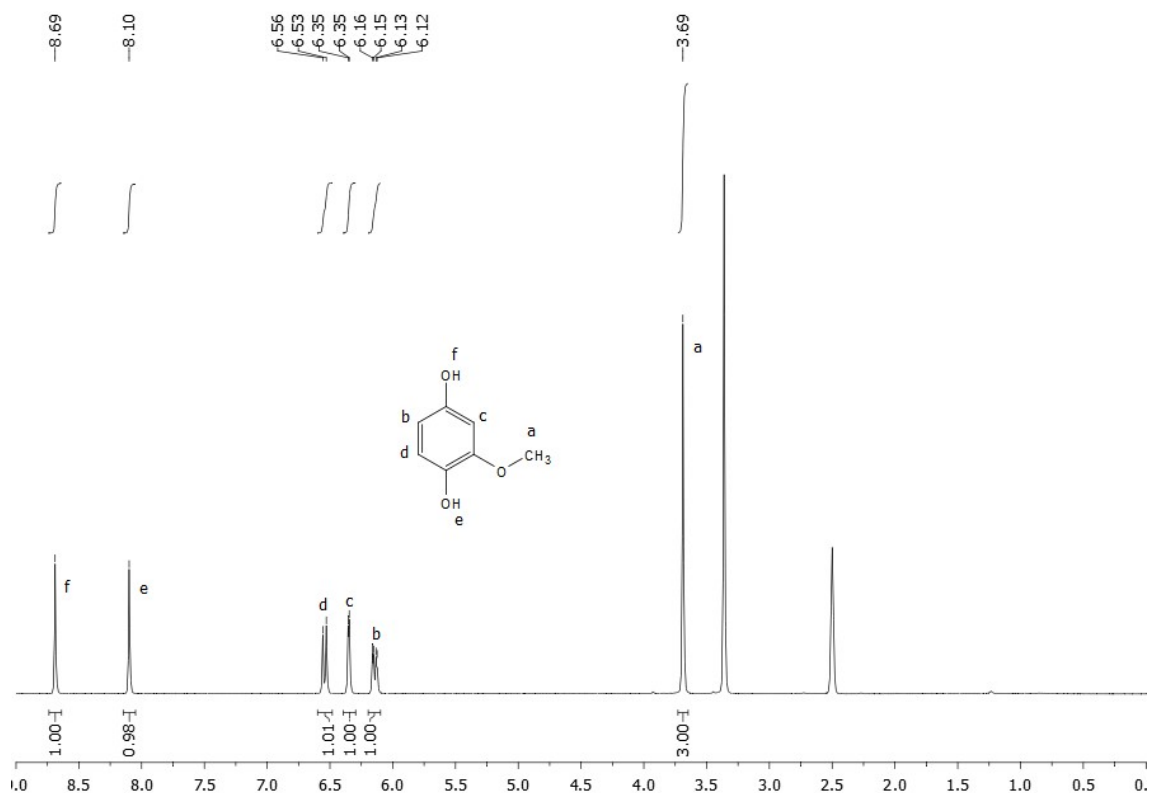

**Figure S3.**  $^1\text{H}$  NMR spectrum of **2** (300 MHz, 298 K, DMSO).

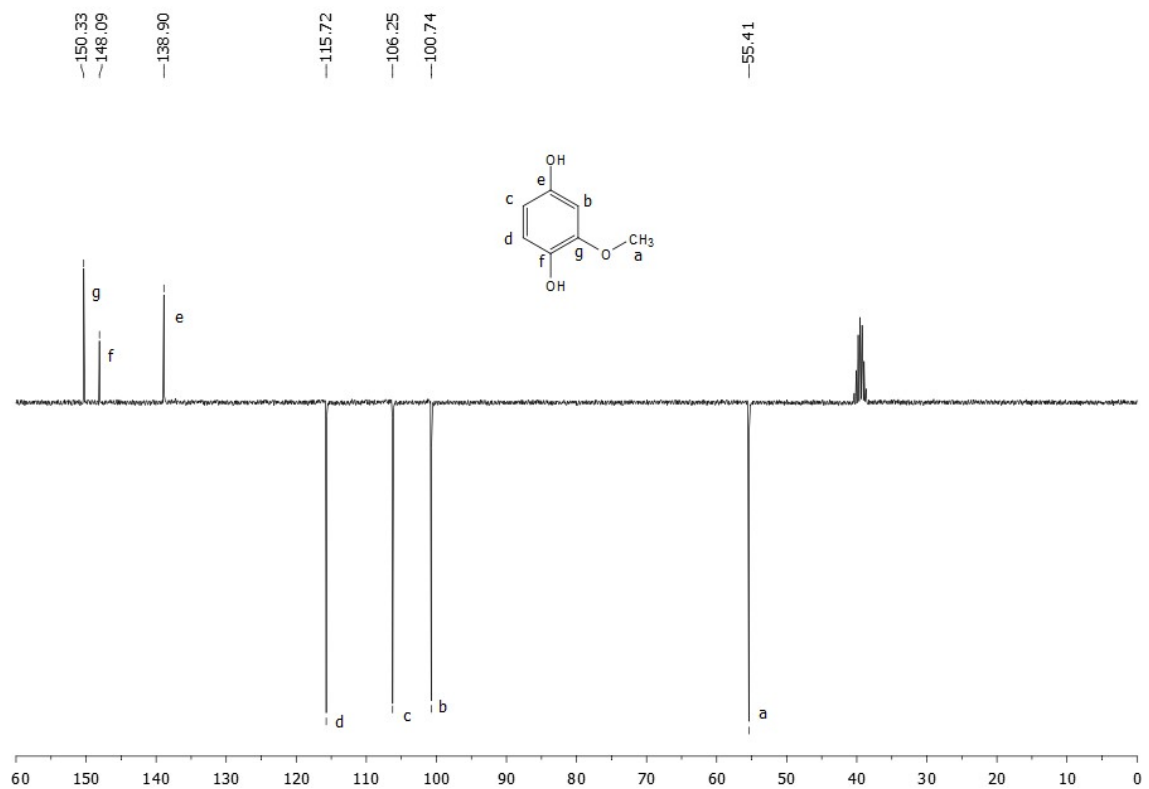

**Figure S4.**  $^{13}\text{C}$  APT NMR spectrum of **2** (75 MHz, 298 K, DMSO).

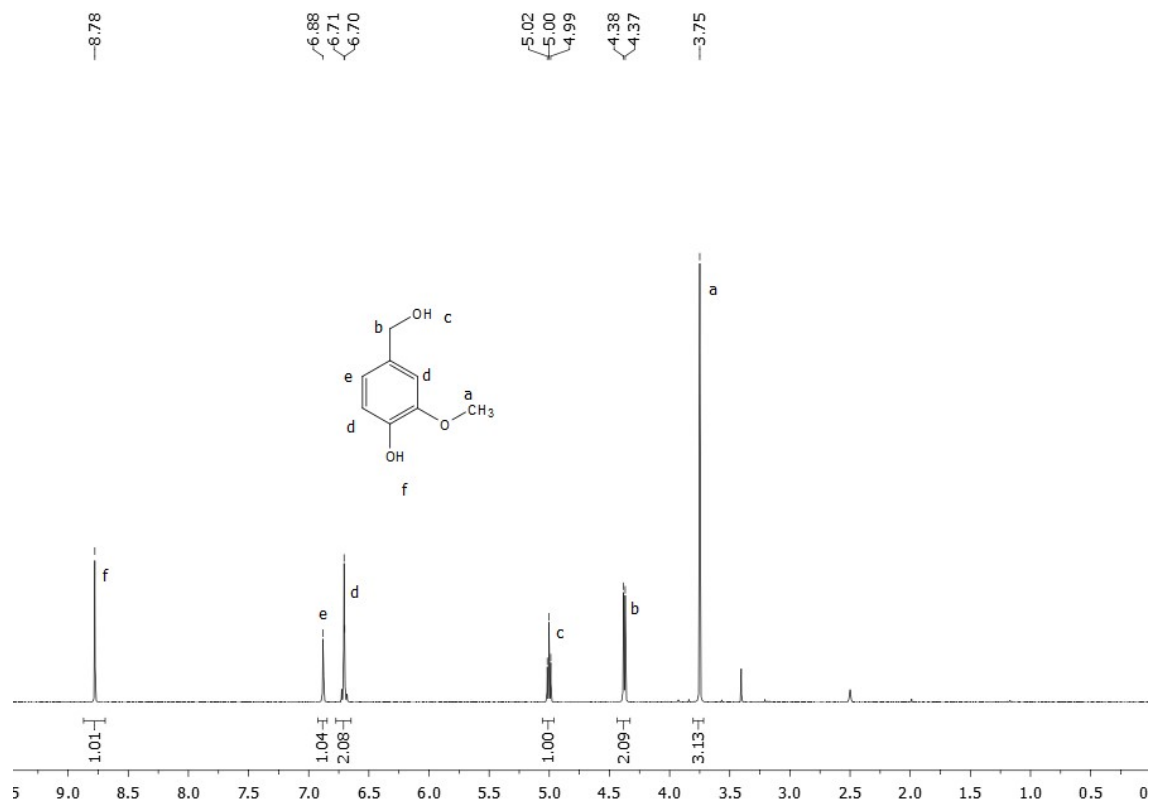

**Figure S5.**  $^1\text{H}$  NMR spectrum of **4** (300 MHz, 298 K, DMSO).

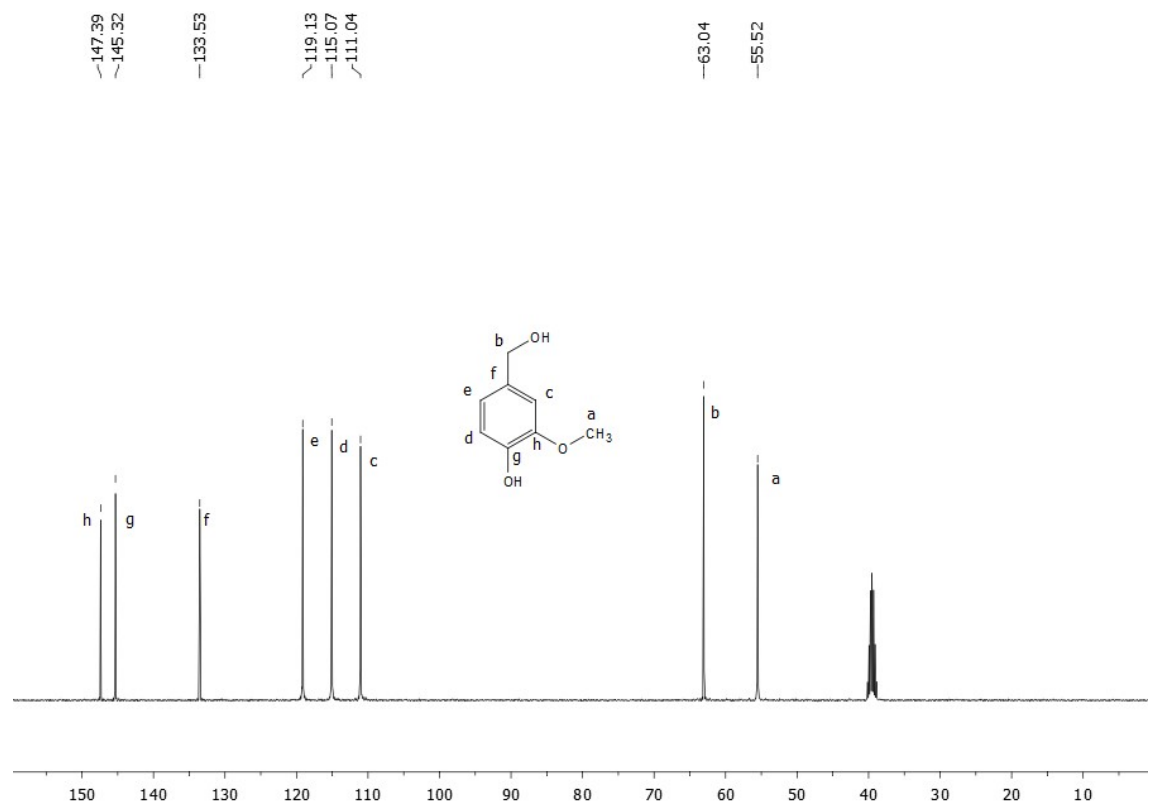

**Figure S6.**  $^{13}\text{C}$  APT NMR spectrum of **4** (75 MHz, 298 K, DMSO).

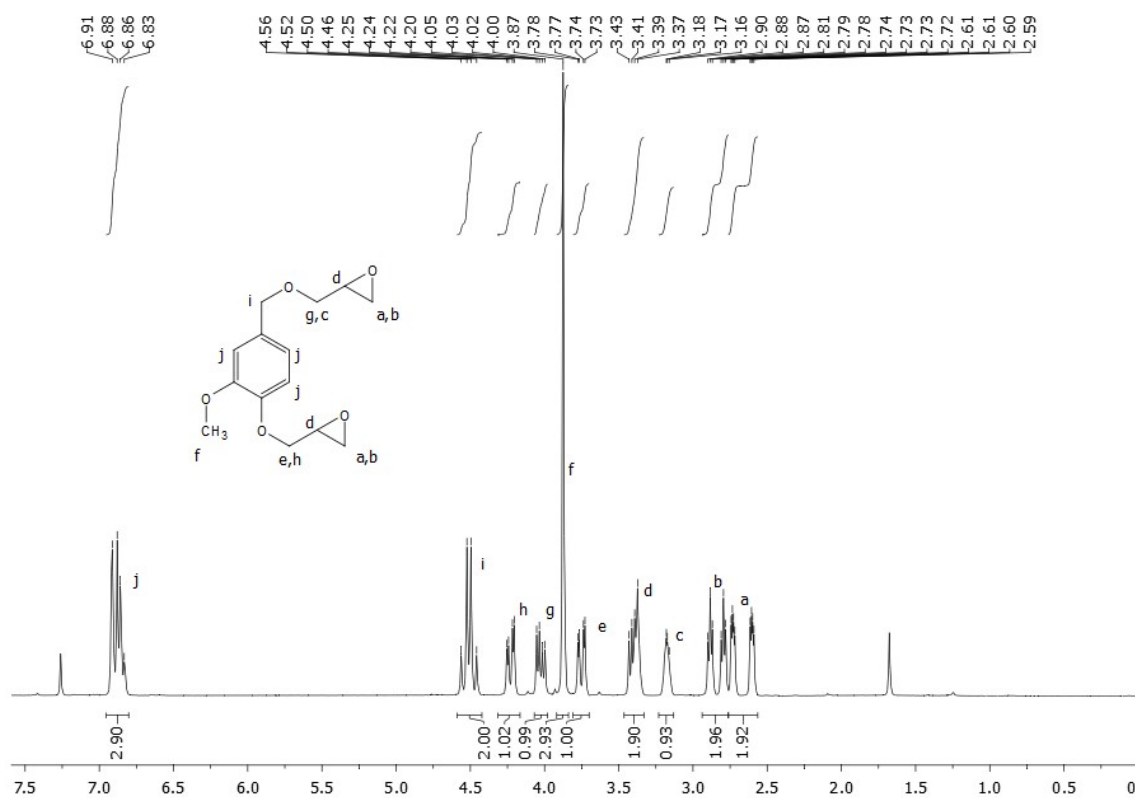

**Figure S7.**  $^1\text{H}$  NMR spectrum of **5** (300 MHz, 298 K,  $\text{CDCl}_3$ ).

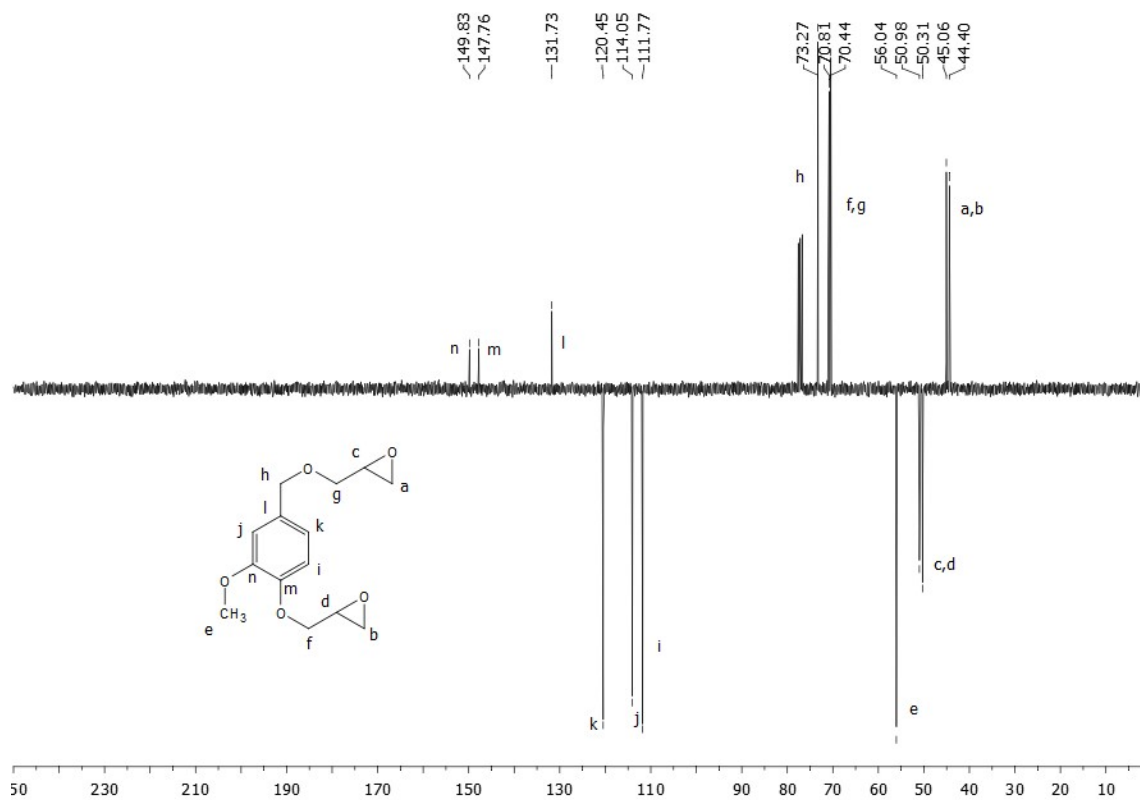

**Figure S8.**  $^{13}\text{C}$  APT NMR spectrum of **5** (75 MHz, 298 K,  $\text{CDCl}_3$ ).

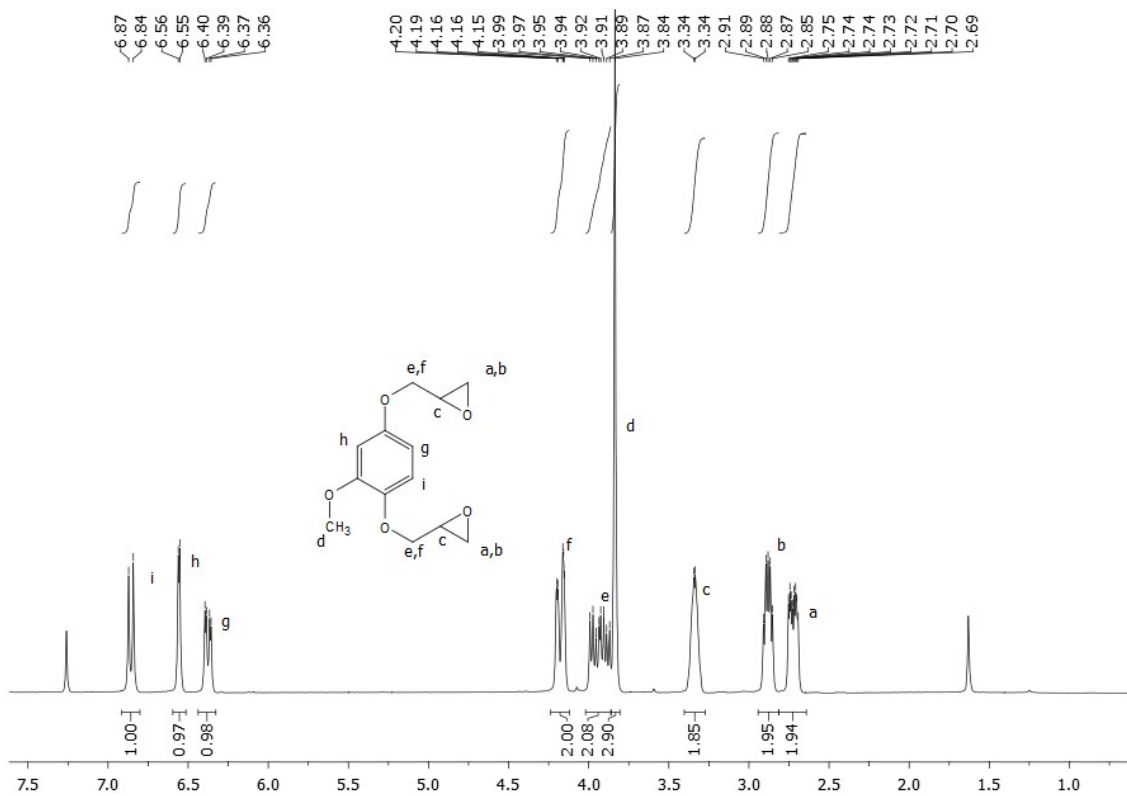

**Figure S9.**  $^1\text{H}$  NMR spectrum of **6** (300 MHz, 298 K,  $\text{CDCl}_3$ ).

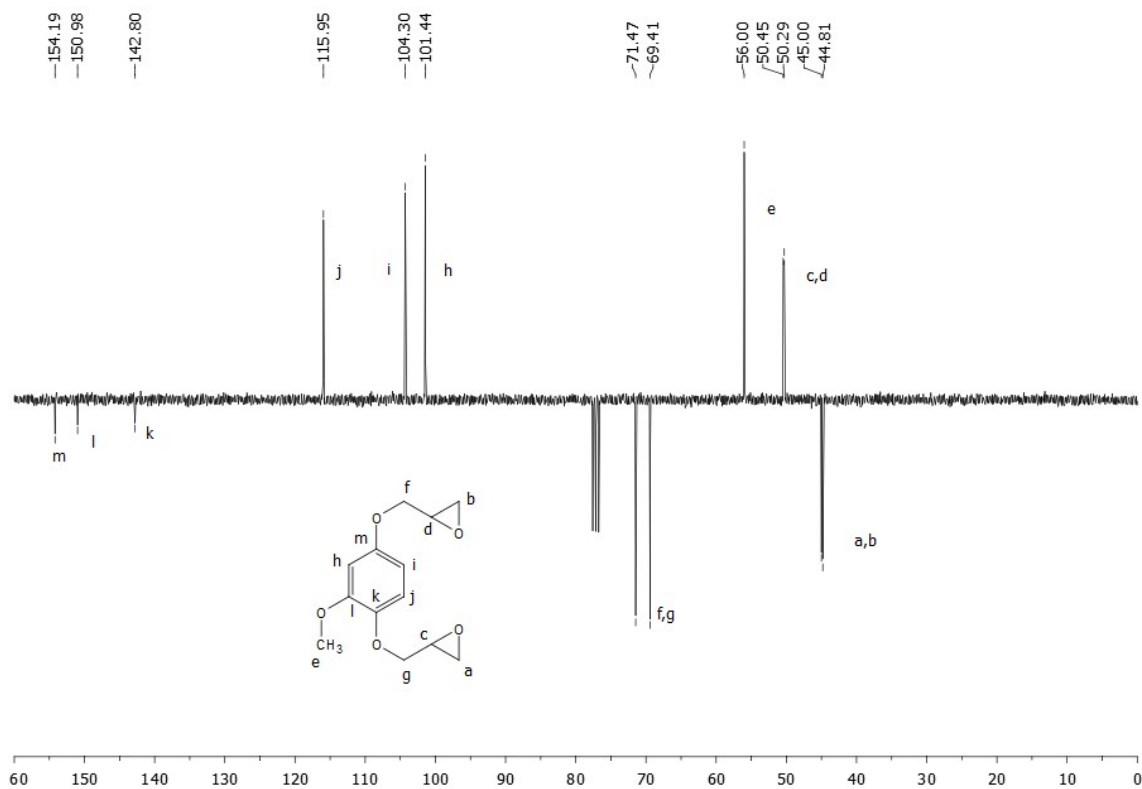

**Figure S10.**  $^{13}\text{C}$  APT NMR spectrum of **6** (75 MHz, 298 K,  $\text{CDCl}_3$ ).

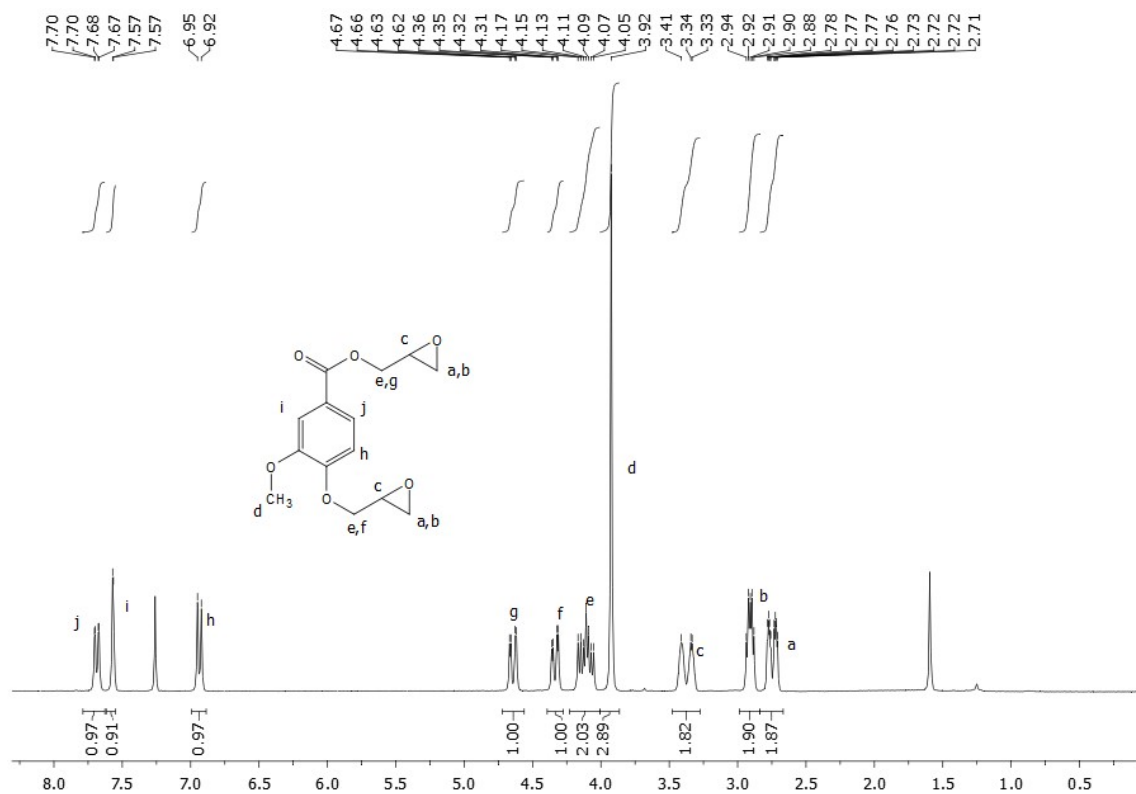

Figure S11.  $^1\text{H}$  NMR spectrum of 7 (300 MHz, 298 K,  $\text{CDCl}_3$ ).

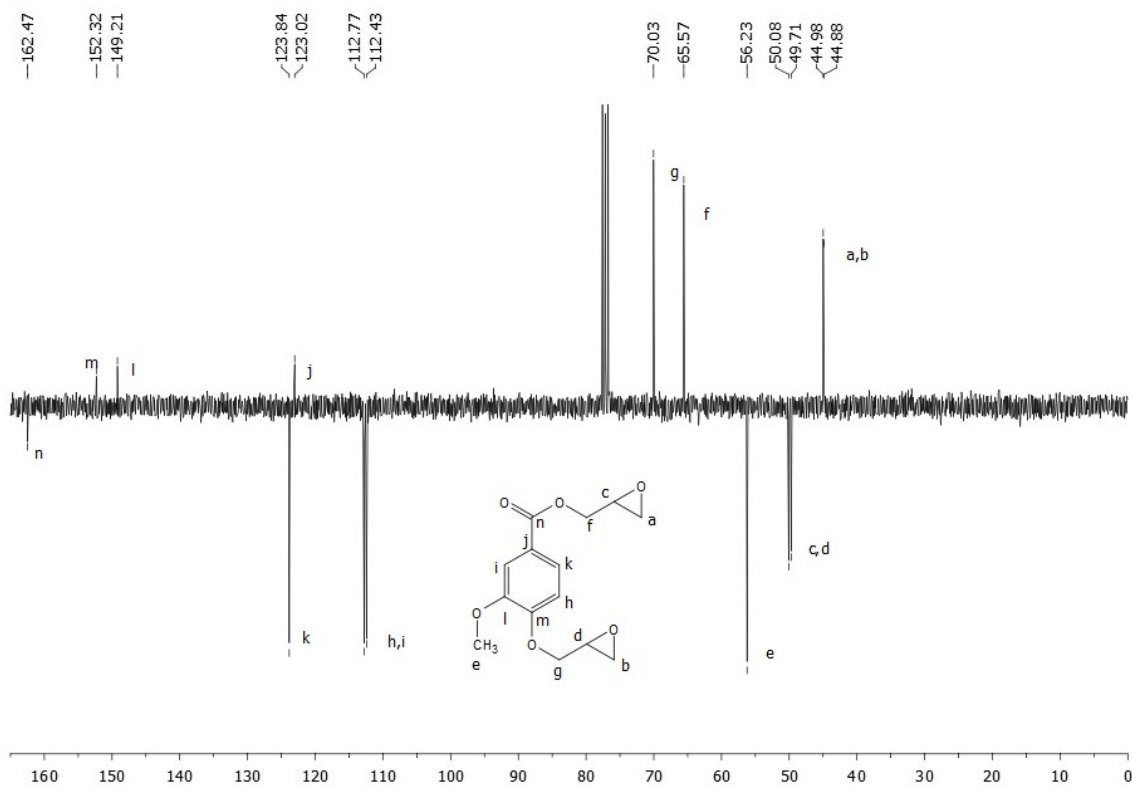

Figure S12.  $^{13}\text{C}$  APT NMR spectrum of 7 (75 MHz, 298 K,  $\text{CDCl}_3$ ).

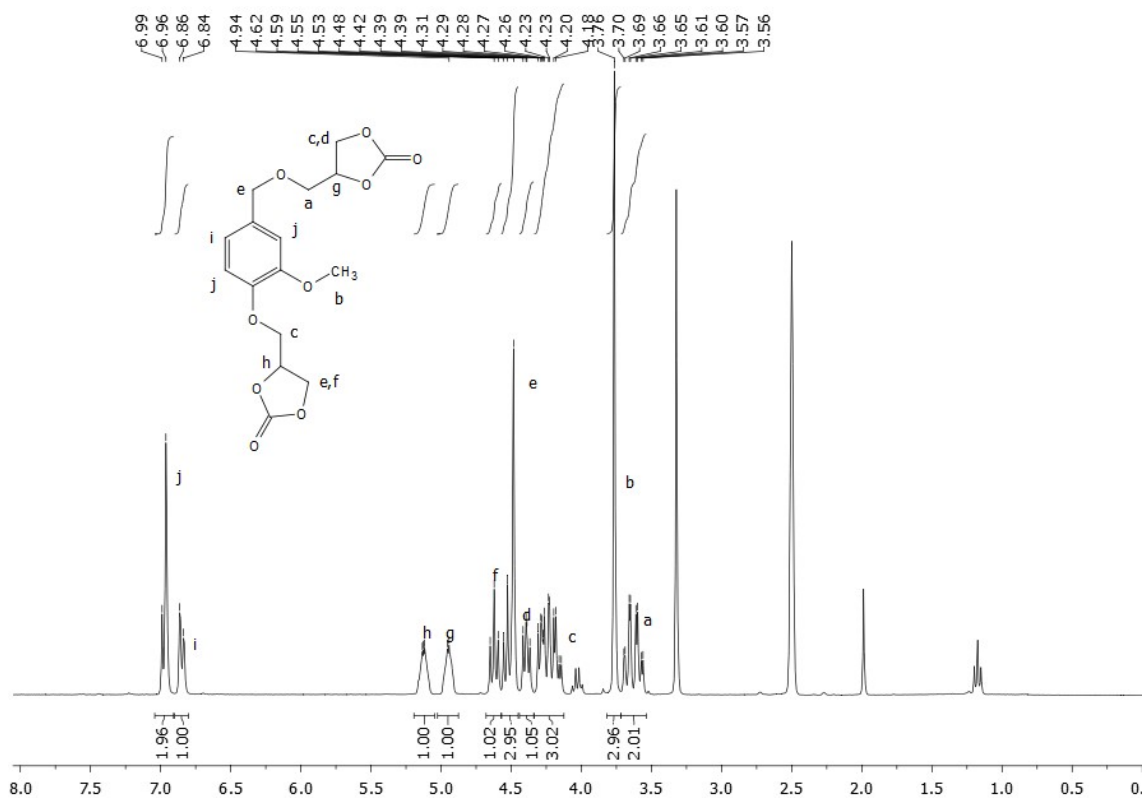

**Figure S17.**  $^1\text{H}$  NMR spectrum of **8** (300 MHz, 298 K, DMSO).

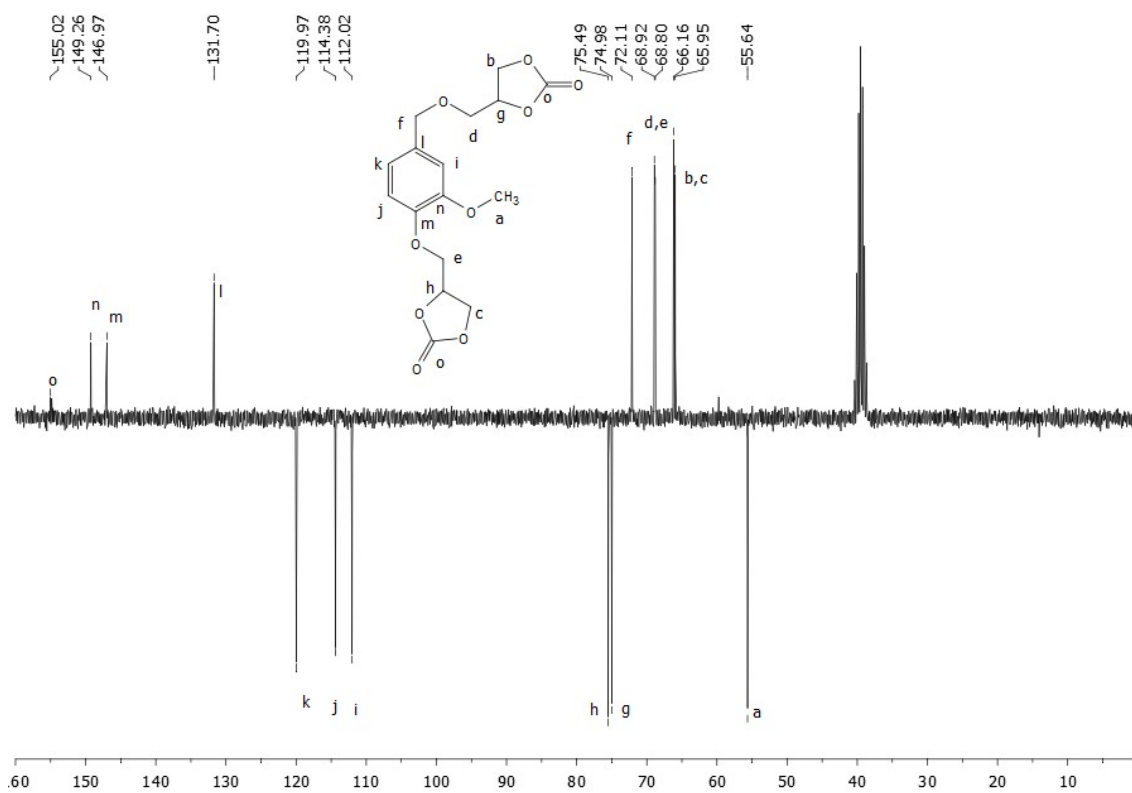

**Figure S18.**  $^{13}\text{C}$  APT NMR spectrum of **8** (75 MHz, 298 K, DMSO).



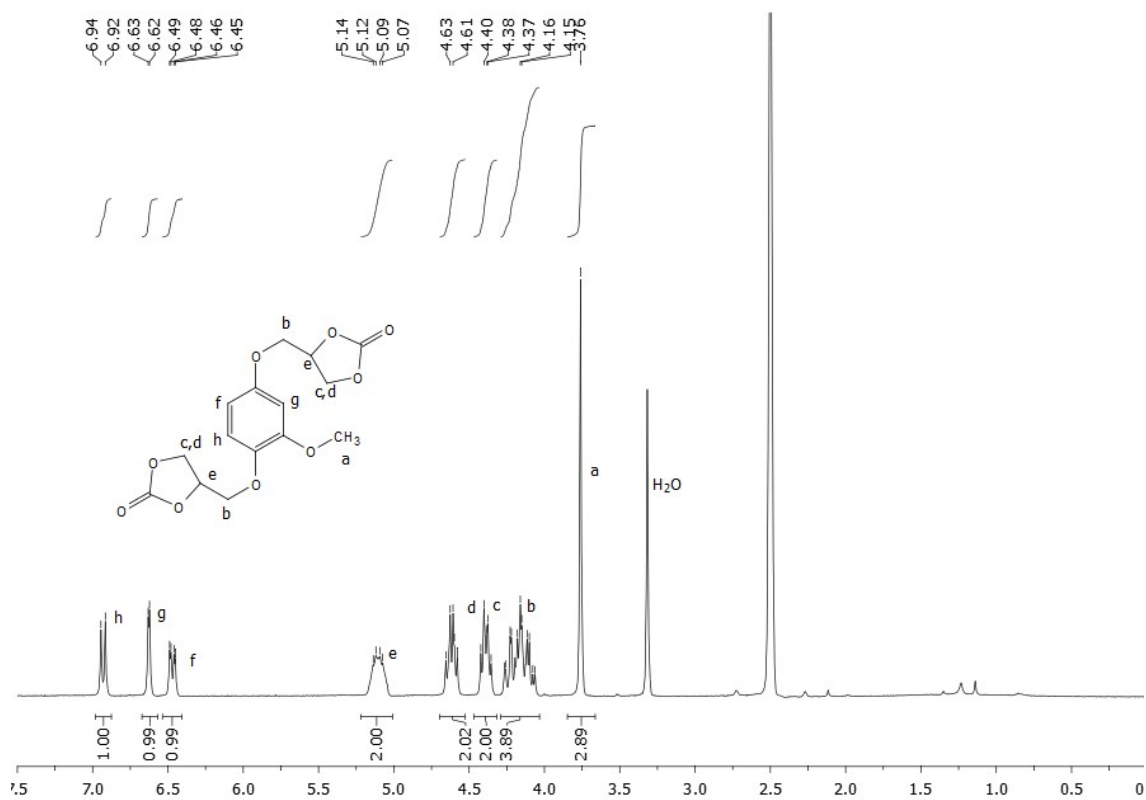

**Figure S19.**  $^1\text{H}$  NMR spectrum of **9** (300 MHz, 298 K, DMSO).

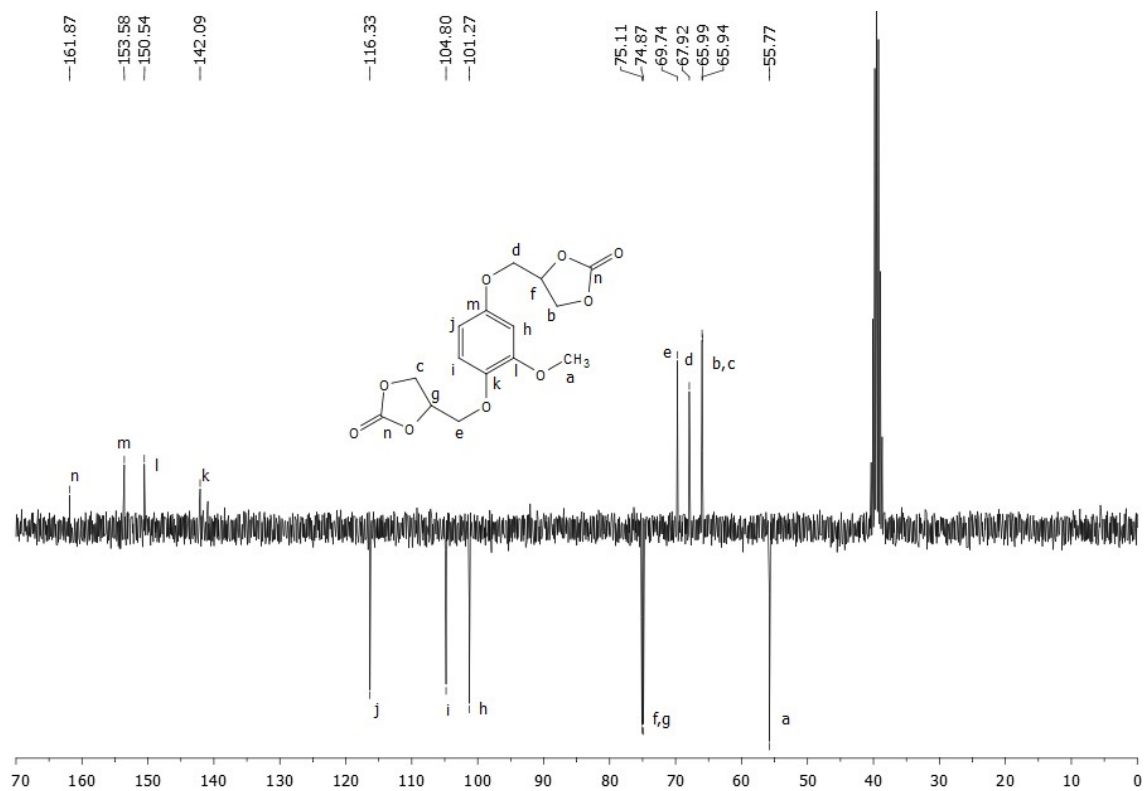

**Figure S20.**  $^{13}\text{C}$  NMR spectrum of **9** (75 MHz, 298 K, DMSO).

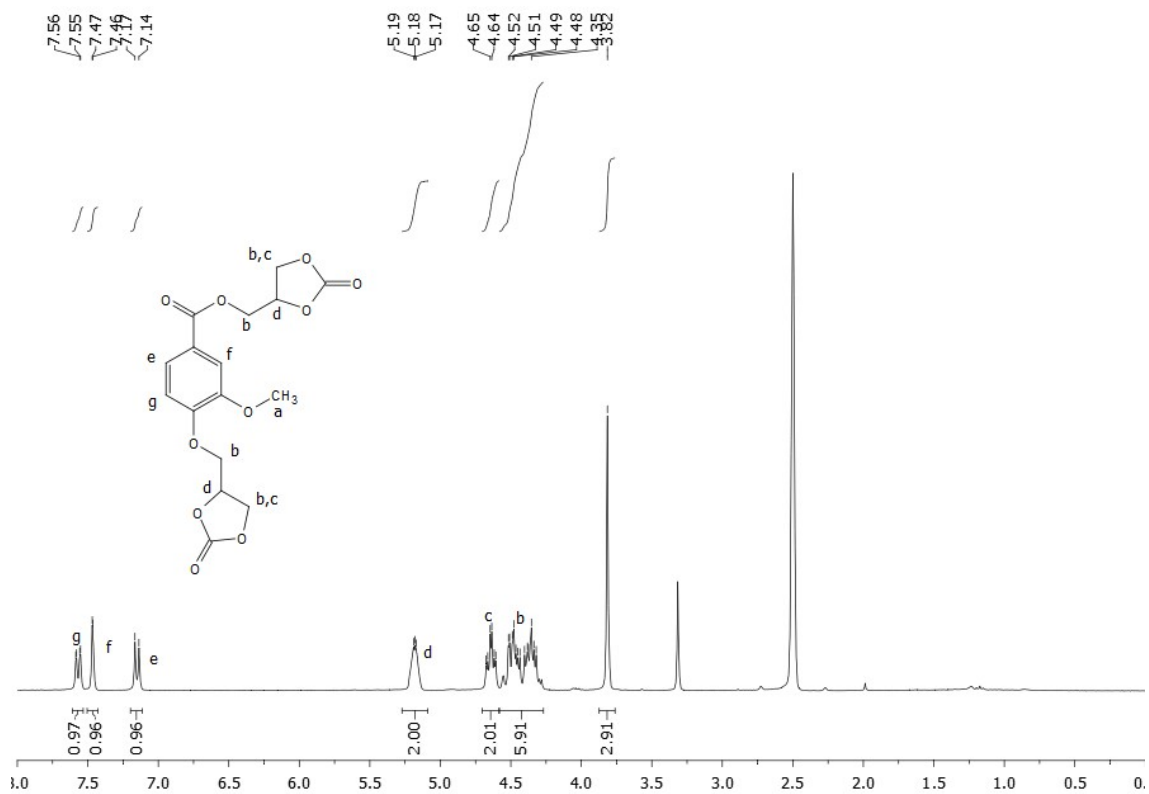

**Figure S21.** <sup>1</sup>H NMR spectrum of **10** (300 MHz, 298 K, DMSO).

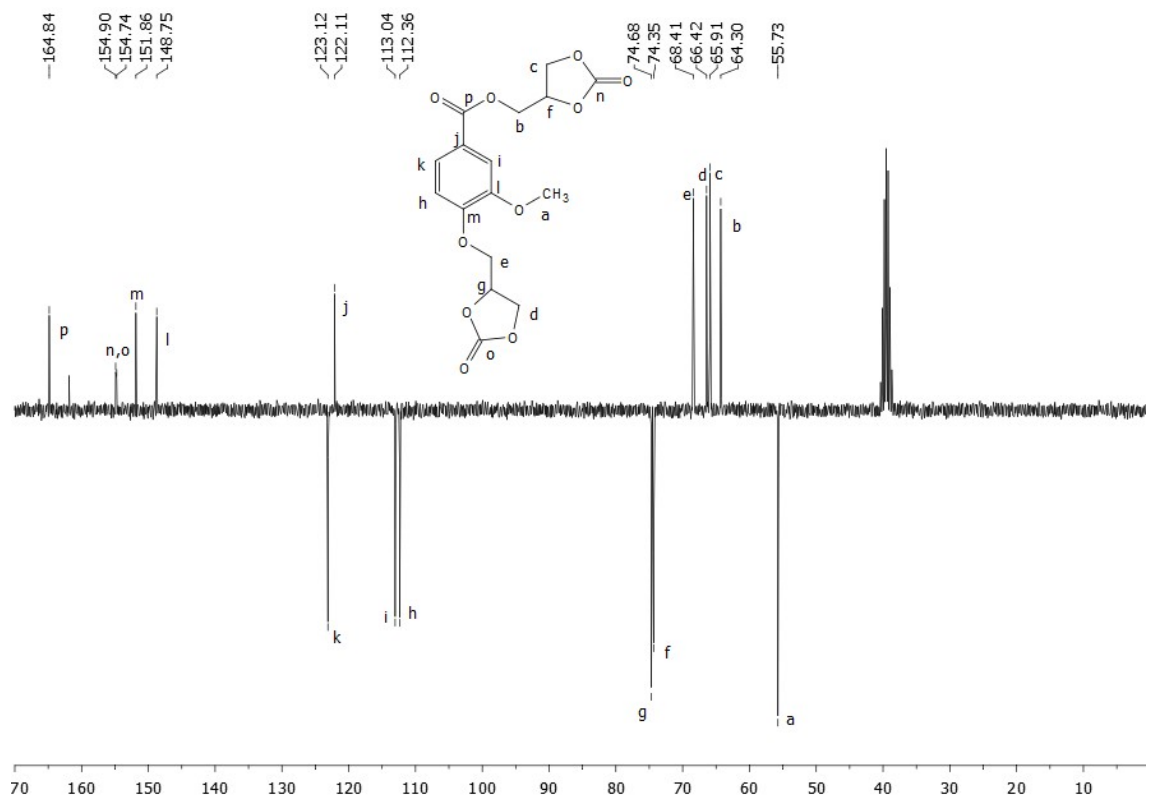

**Figure S22.** <sup>13</sup>C APT NMR spectrum of **10** (75 MHz, 298 K, DMSO).

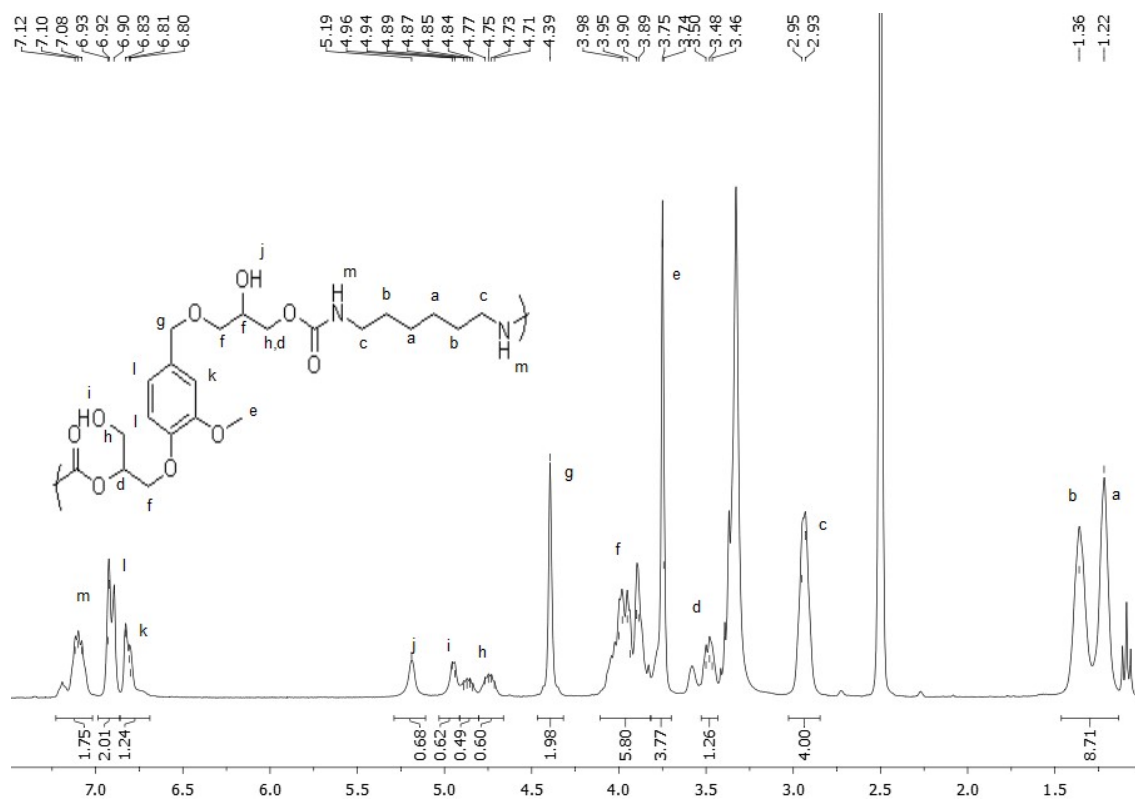

**Figure S23.**  $^1\text{H}$  NMR spectrum of NIPU 11 (300 MHz, 298 K, DMSO).

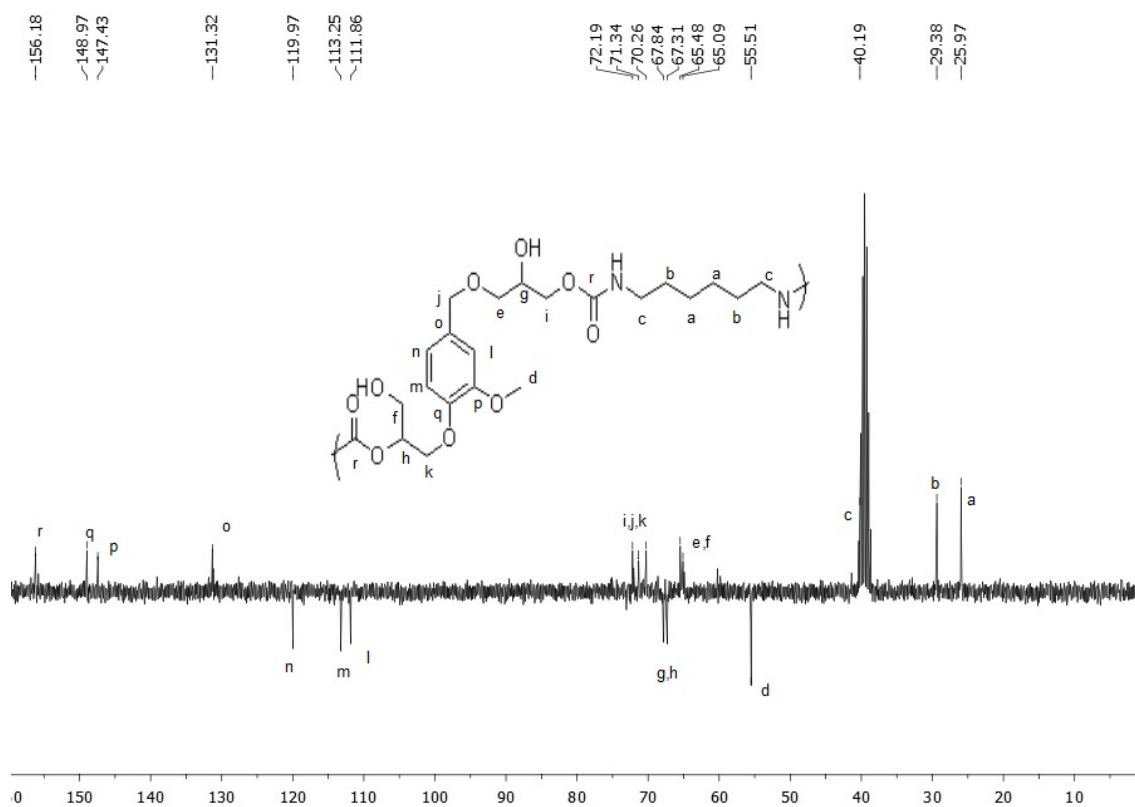

**Figure S24.**  $^{13}\text{C}$  APT NMR spectrum of NIPU 11 (75 MHz, 298 K, DMSO).

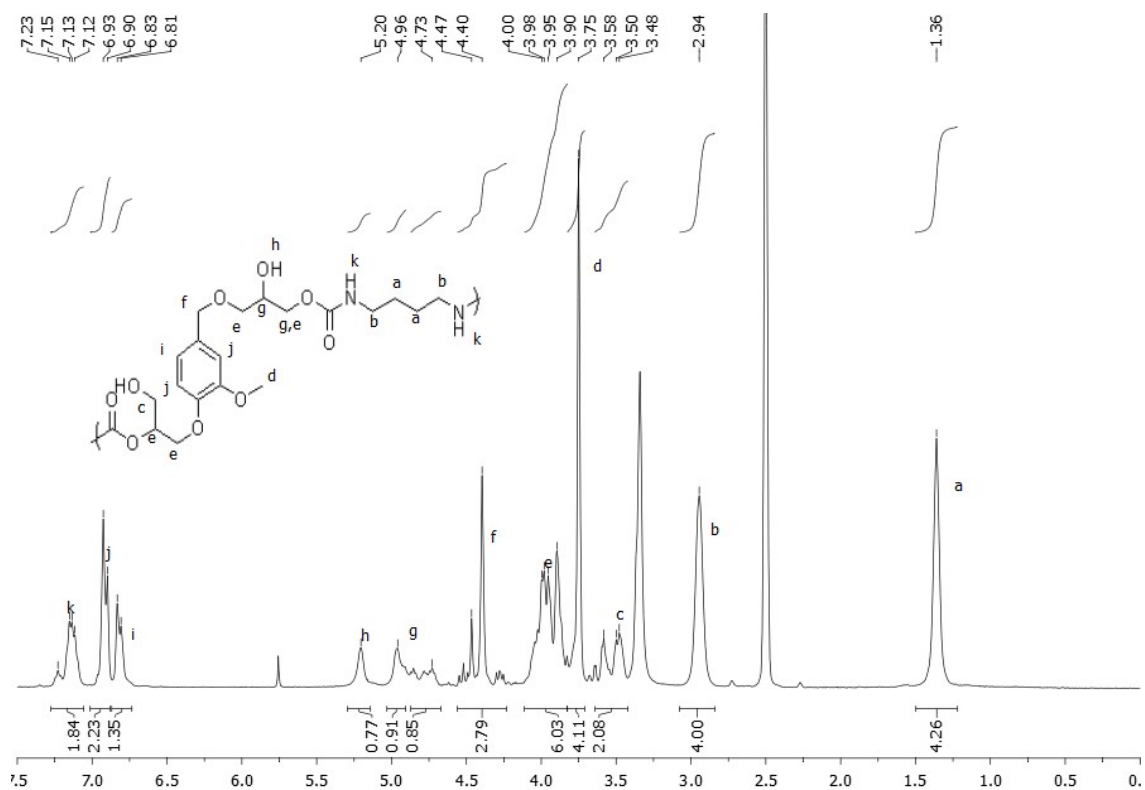

**Figure S25.**  $^1\text{H}$  NMR spectrum of NIPU 12 (300 MHz, 298 K, DMSO).

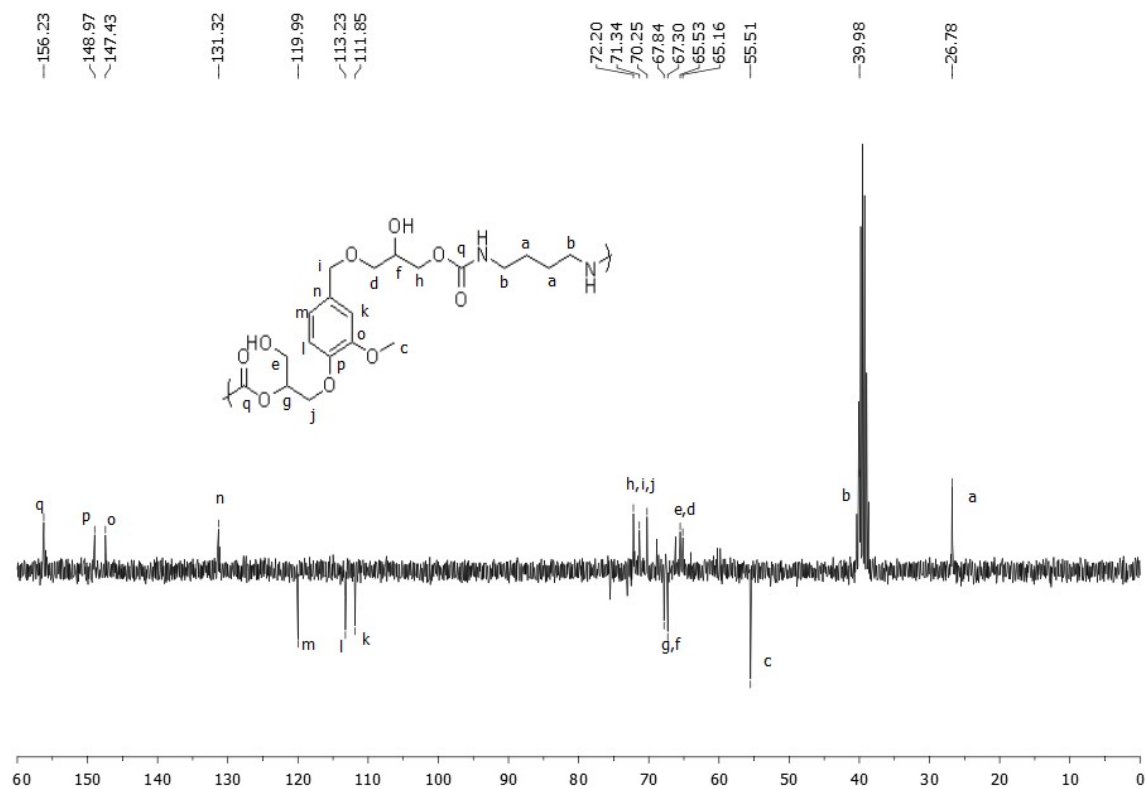

**Figure S26.**  $^{13}\text{C}$  APT NMR spectrum of NIPU 12 (75 MHz, 298 K, DMSO).

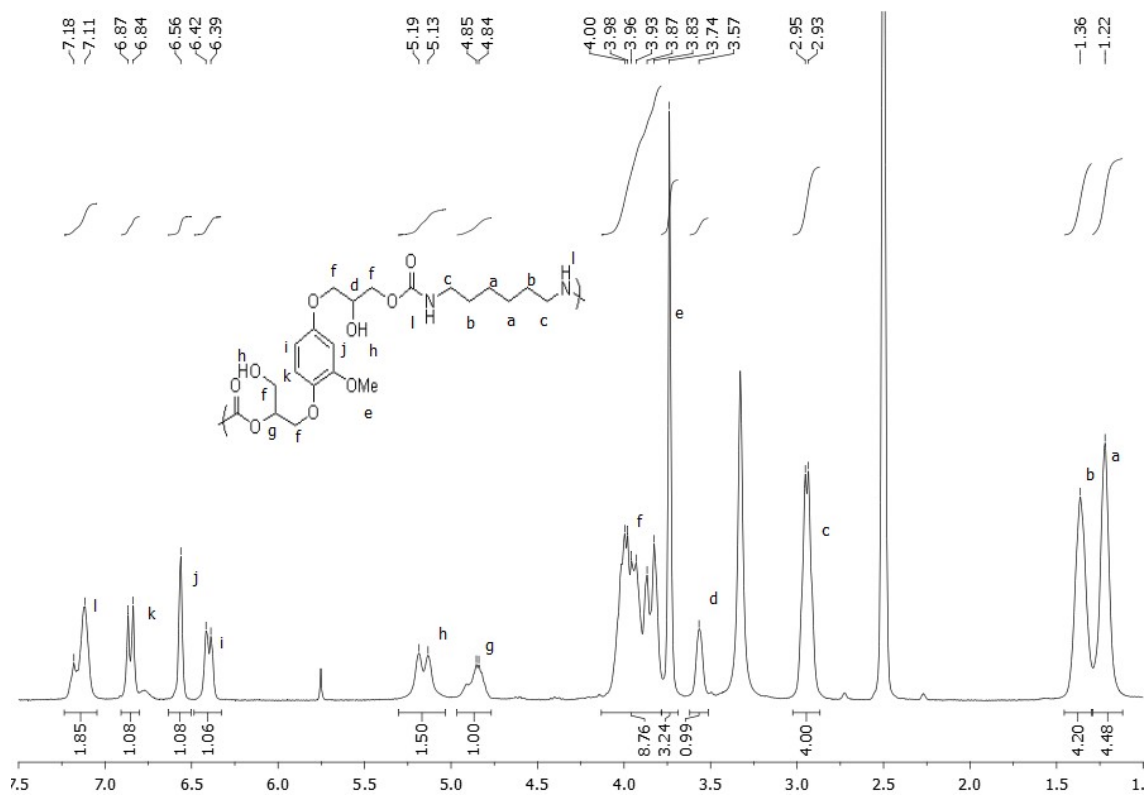

**Figure S27.**  $^1\text{H}$  NMR spectrum of NIPU **13** (300 MHz, 298 K, DMSO).

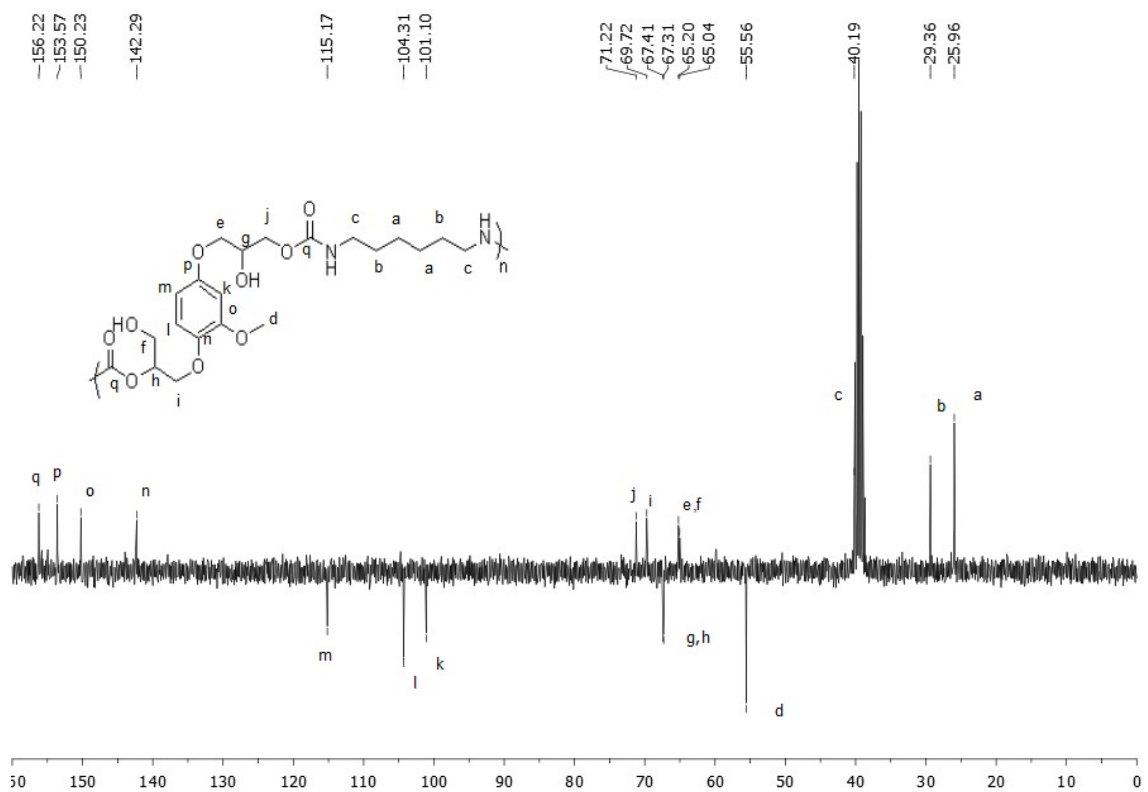

**Figure S28.**  $^{13}\text{C}$  APT NMR spectrum of NIPU **13** (75 MHz, 298 K, DMSO).

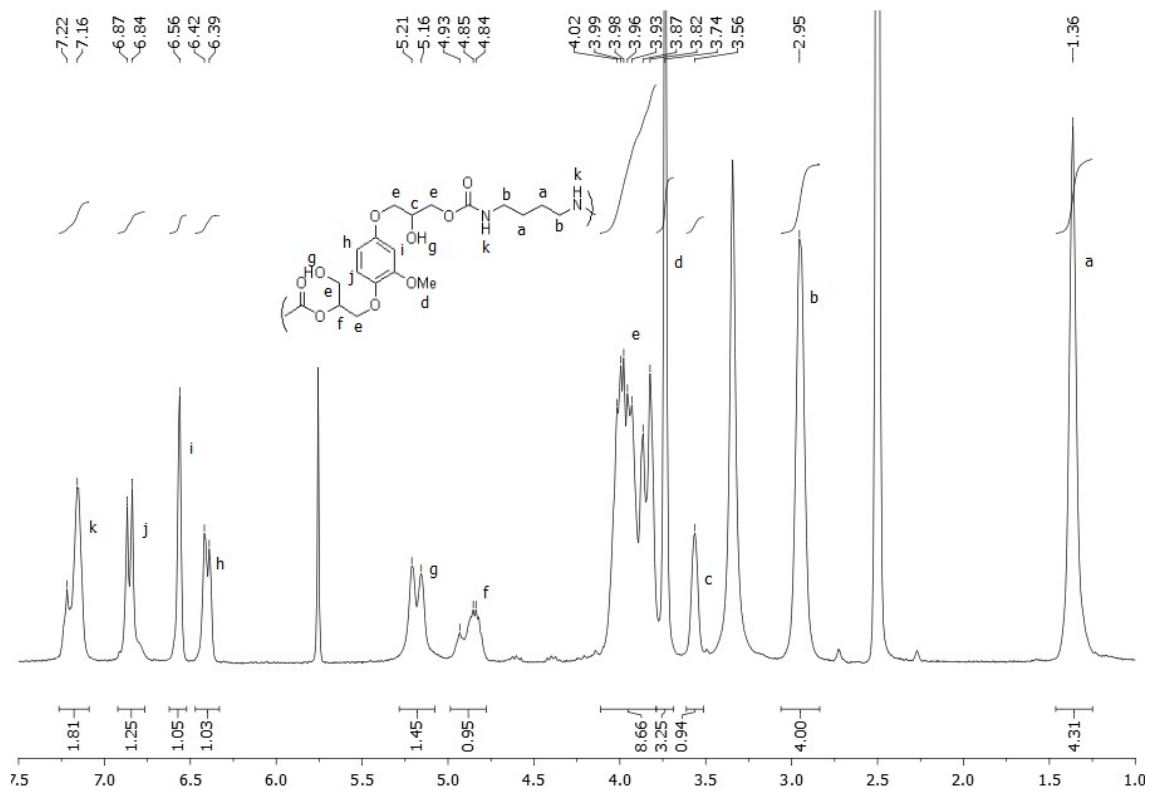

**Figure S29.**  $^1\text{H}$  NMR spectrum of NIPU **14** (300 MHz, 298 K, DMSO).

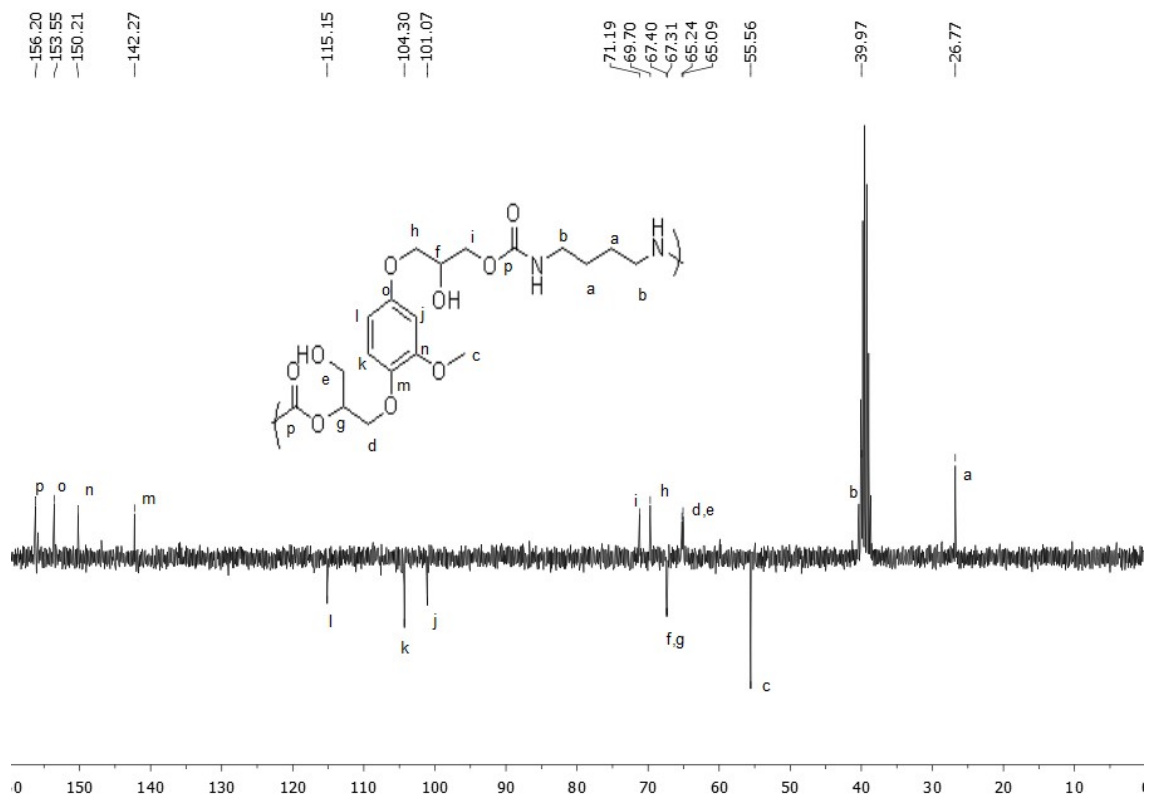

**Figure S30.**  $^{13}\text{C}$  APT NMR spectrum of NIPU **14** (75 MHz, 298 K, DMSO).

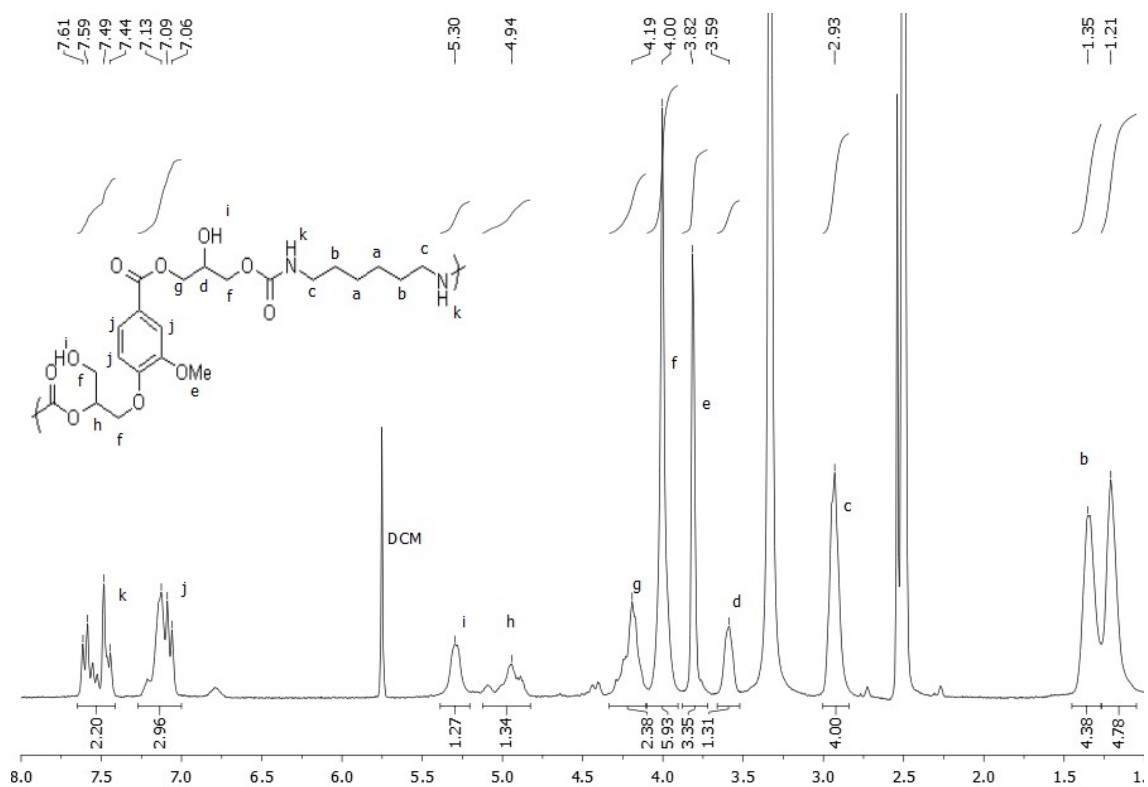

**Figure S31.**  $^1\text{H}$  NMR spectrum of NIPU 15 (300 MHz, 298 K, DMSO).

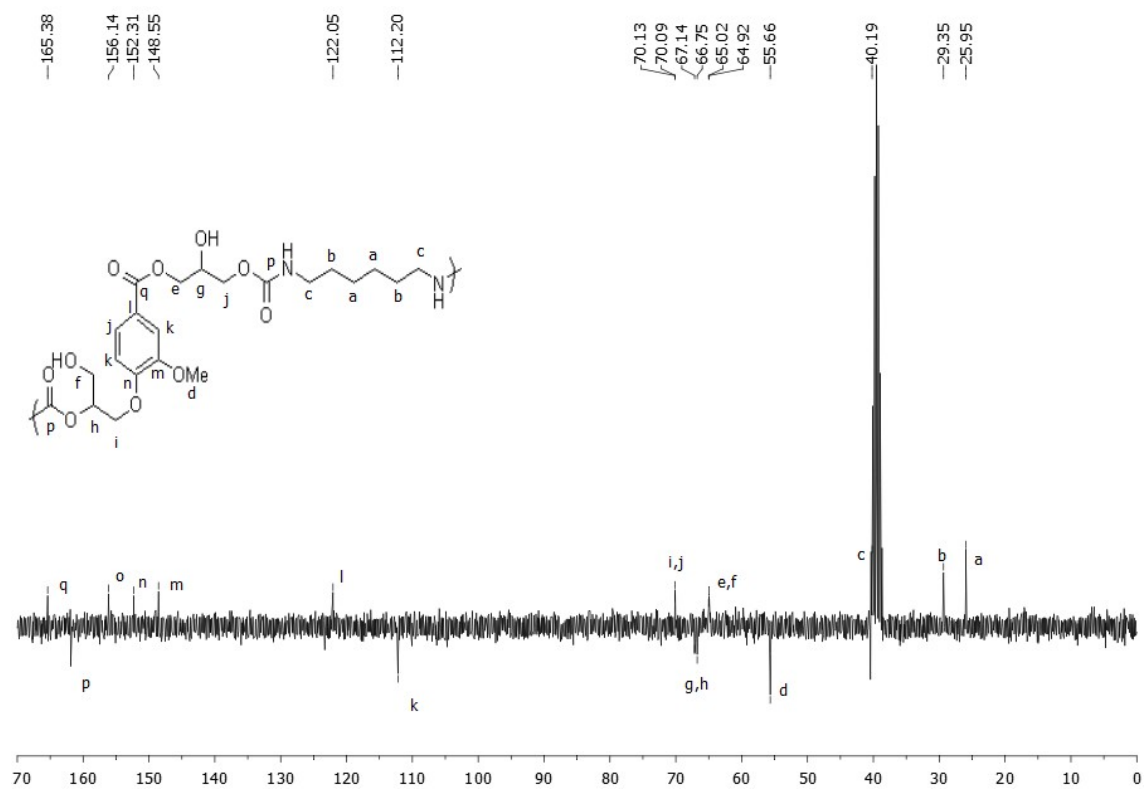

**Figure S32.**  $^{13}\text{C}$  APT NMR spectrum of NIPU 15 (75 MHz, 298 K, DMSO).

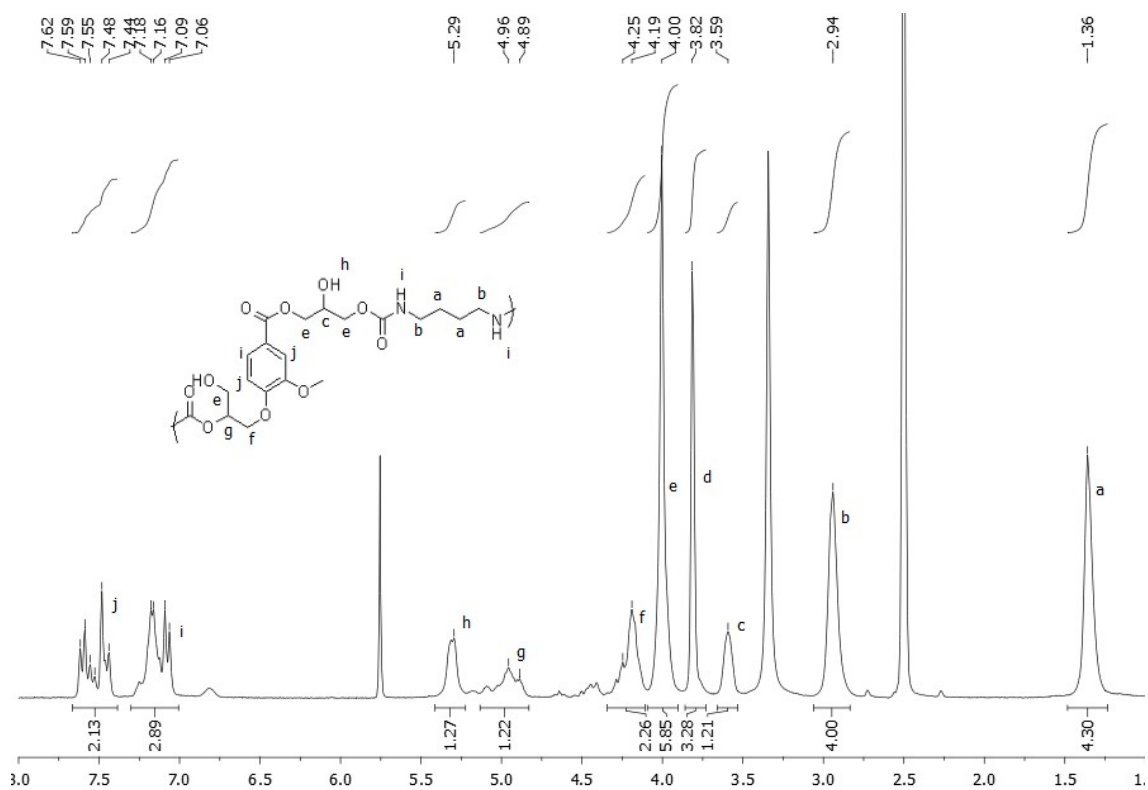

**Figure S33.**  $^1\text{H}$  NMR spectrum of NIPU 16 (300 MHz, 298 K, DMSO).

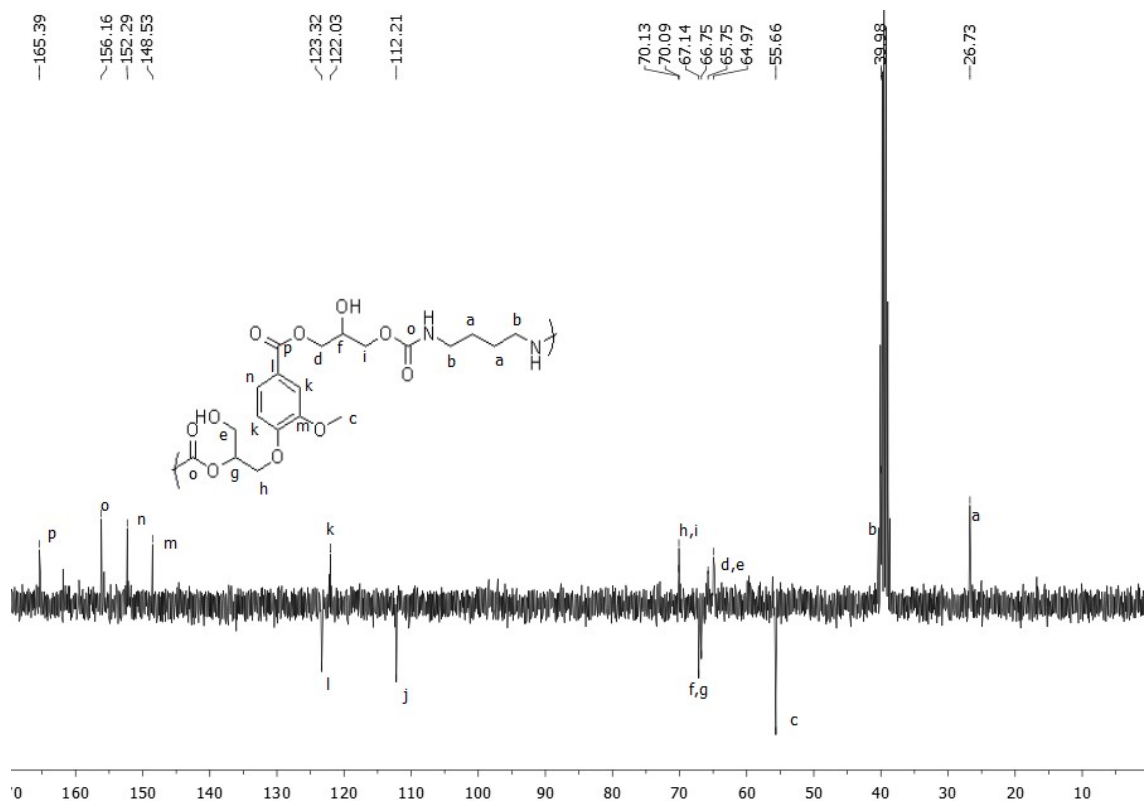

**Figure S34.**  $^{13}\text{C}$  APT NMR spectrum of NIPU 16 (75 MHz, 298 K, DMSO).



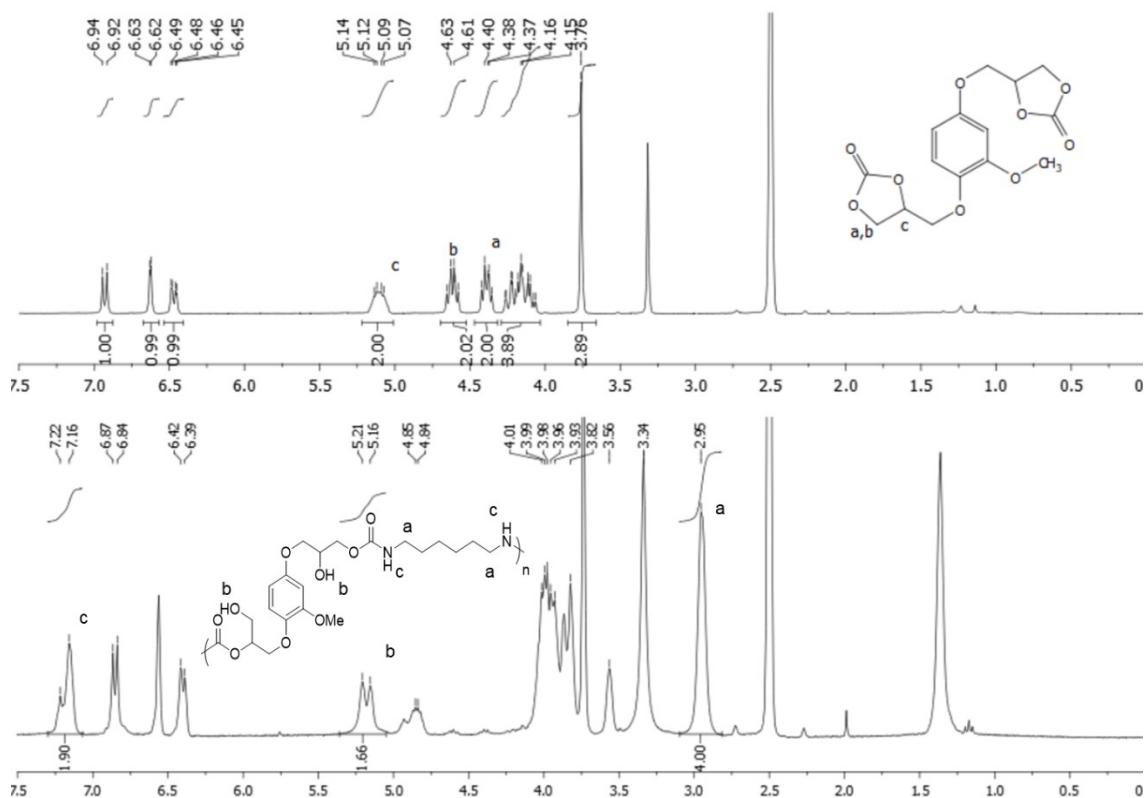

**Figure S35.** <sup>1</sup>H NMR spectrum of hydroquinone-based bis-carbonate (9) (top) and the resultant hydroquinone-based NIPHU (13) (bottom) by reaction of 9 and HDMA in DMSO at 80 °C for 24 h (300 MHz, 298 K, DMSO).

### FTIR spectra

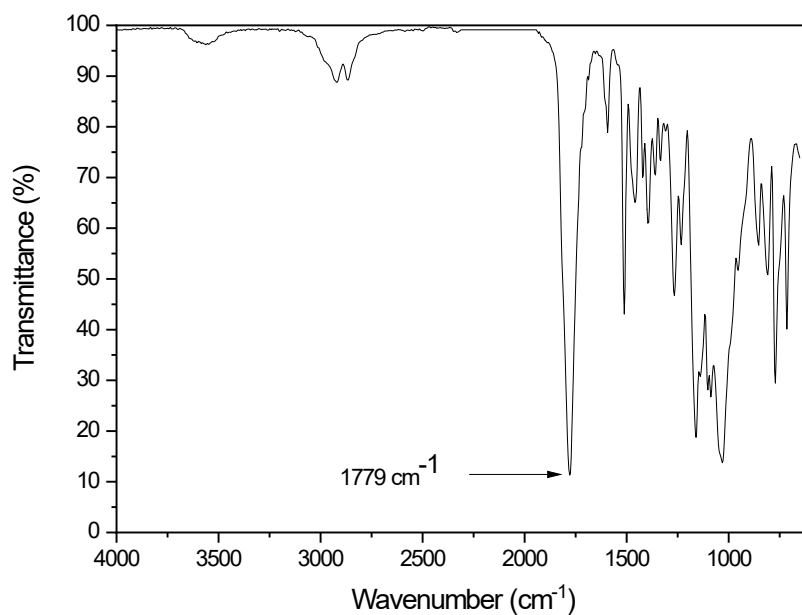

**Figure S36.** FT-IR spectrum of 8.

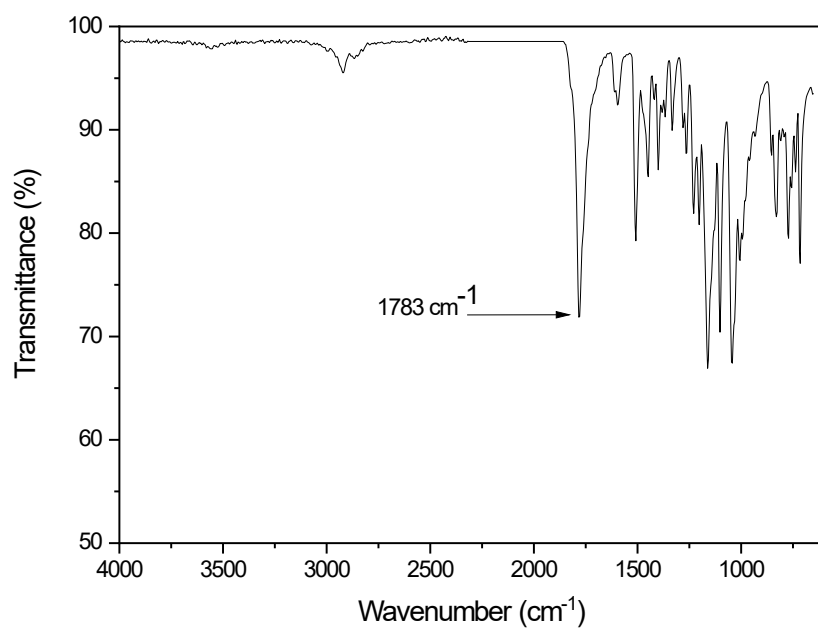

**Figure S37.** FT-IR spectrum of **9**.

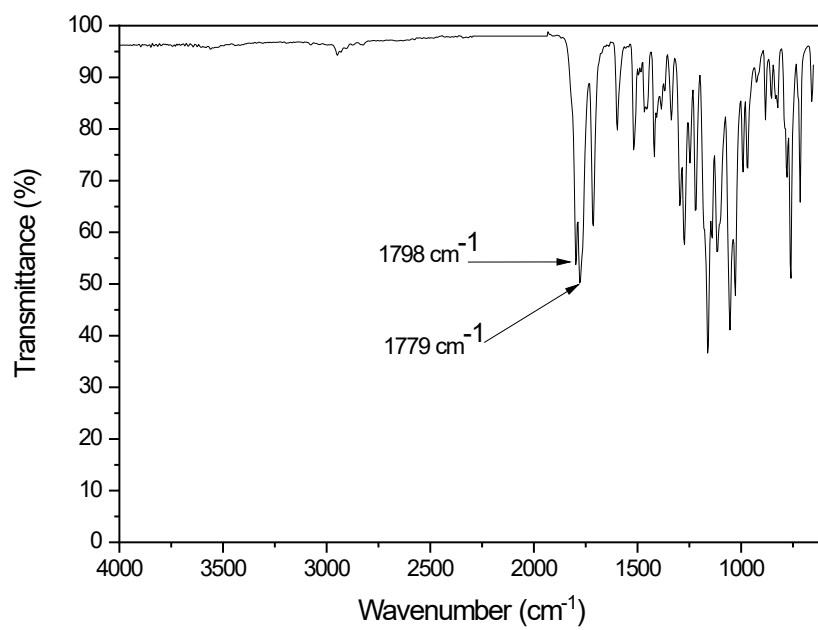

**Figure S38.** FT-IR spectrum of **10**.

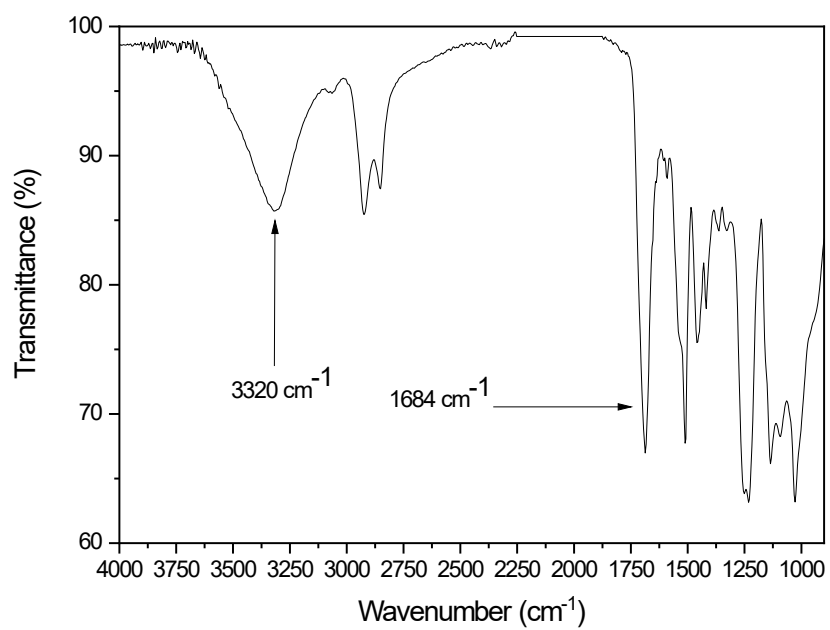

**Figure S39.** FT-IR spectrum of PHU 11.

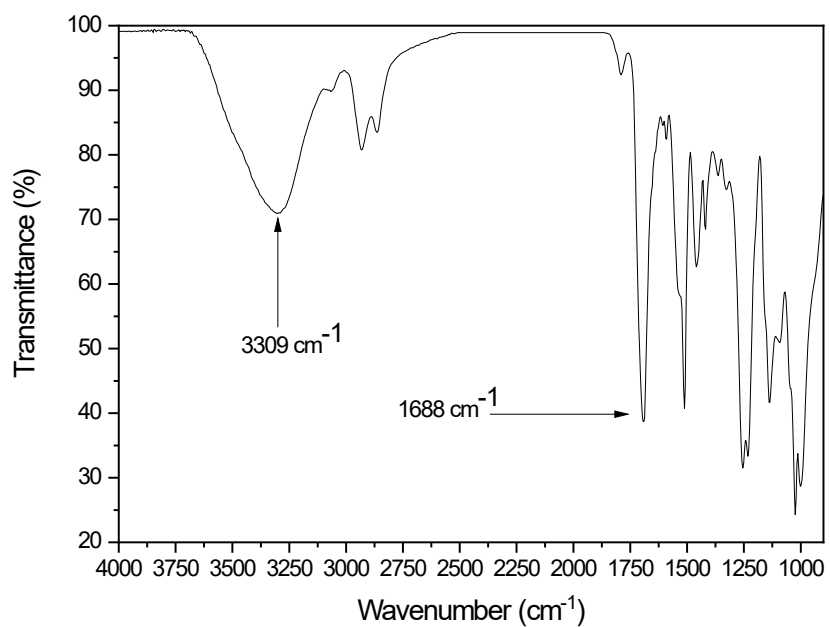

**Figure S40.** FT-IR spectrum of PHU 12.

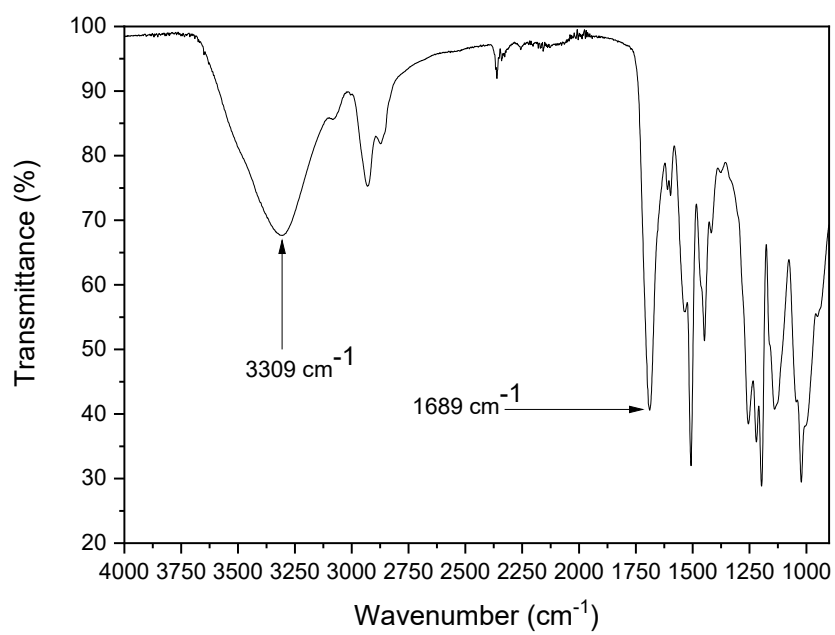

**Figure S41.** FT-IR spectrum of PHU 14.

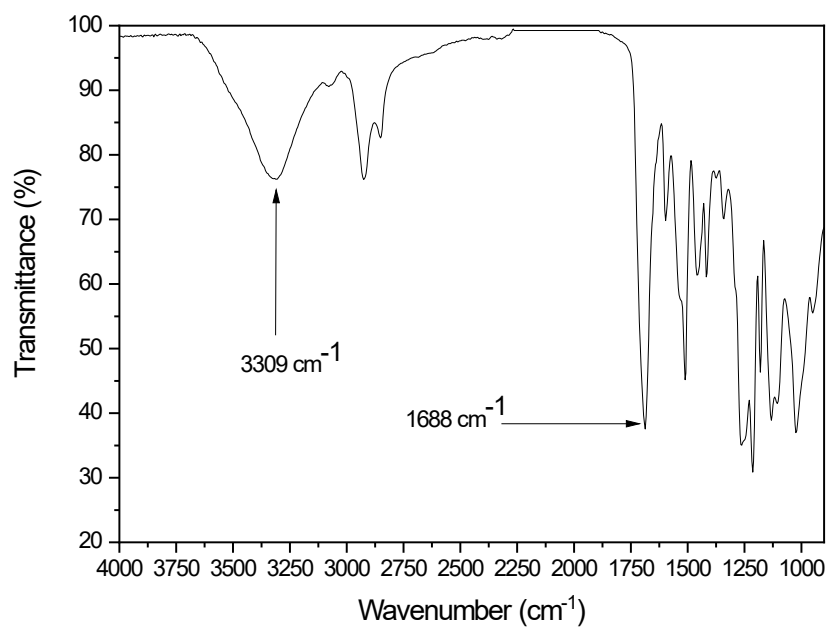

**Figure S42.** FT-IR spectrum of PHU 15.

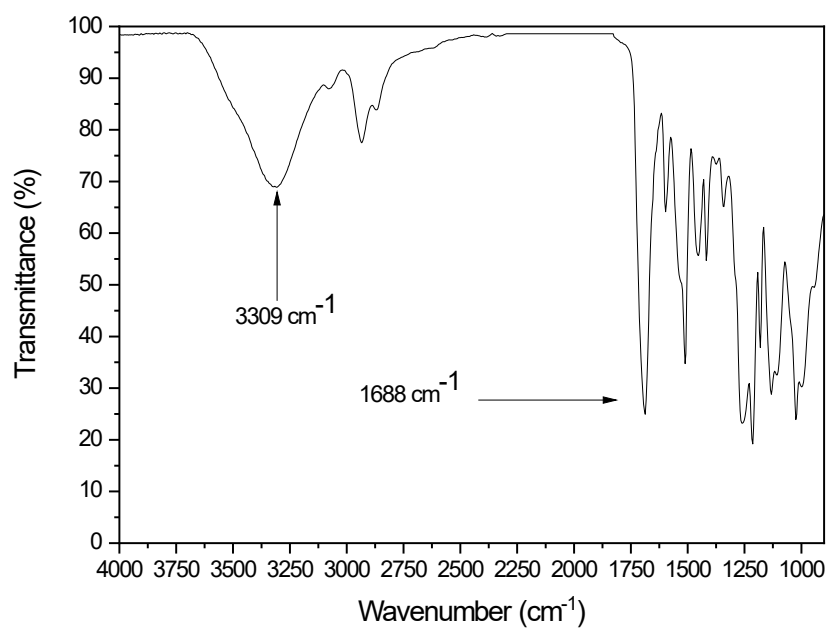

**Figure S43.** FT-IR spectrum of PHU 16.

### References

1. N. Fanjul-Mosteirín, C. Jehanno, F. Ruipérez, H. Sardon and A. P. Dove, *ACS Sustainable Chemistry & Engineering*, 2019, **7**, 10633-10640.
2. M. Fache, E. Darroman, V. Besse, R. Auvergne, S. Caillol and B. Boutevin, *Green Chem.*, 2014, **16**, 1987-1998.
3. Z. Lu, C. Hu, J. Guo, J. Li, Y. Cui and Y. Jia, *Org Lett*, 2010, **12**, 480-483.
